# Supplementary material for: Free-standing Bi–Sb–Te films derived from thermal annealing of sputter-deposited Sb2Te3/Bi2Te3multilayer films for thermoelectric applications
Source: Royal Society of Chemistry journal article supplement (doi:10.1039/c5ce01341k), 2015-01-01
Supplement: c5ce01341k2.pdf [file c5ce01341k2.pdf]

*Supporting Information for*

# Free-standing Bi-Sb-Te films derived from a thermal annealing of sputter-deposited $\text{Sb}_2\text{Te}_3/\text{Bi}_2\text{Te}_3$ multilayer films for thermoelectric applications

*By Byeong Geun Kim,<sup>a</sup> Chang-Hyun Lim,<sup>a</sup> Soon-Mok Choi,<sup>b</sup> Won-Seon Seo,<sup>a</sup> Hong-Lim Lee,<sup>c</sup> Sang-Hoon Hyun,<sup>c</sup> and Seong-Min Jeong<sup>\*a</sup>*

<sup>a</sup> Energy & Environmental Division, Korea Institute of Ceramic Engineering and Technology, Jinju 660-031, Korea

<sup>b</sup> School of Energy Materials Chemical Engineering, Korea University of Technology and Education, Cheonan 330-708, Korea

<sup>c</sup> Department of Materials Science and Engineering, Yonsei University, Seoul 120-749, Korea

\* To whom correspondence should be addressed. E-mail: [smjeong@kicet.re.kr](mailto:smjeong@kicet.re.kr)

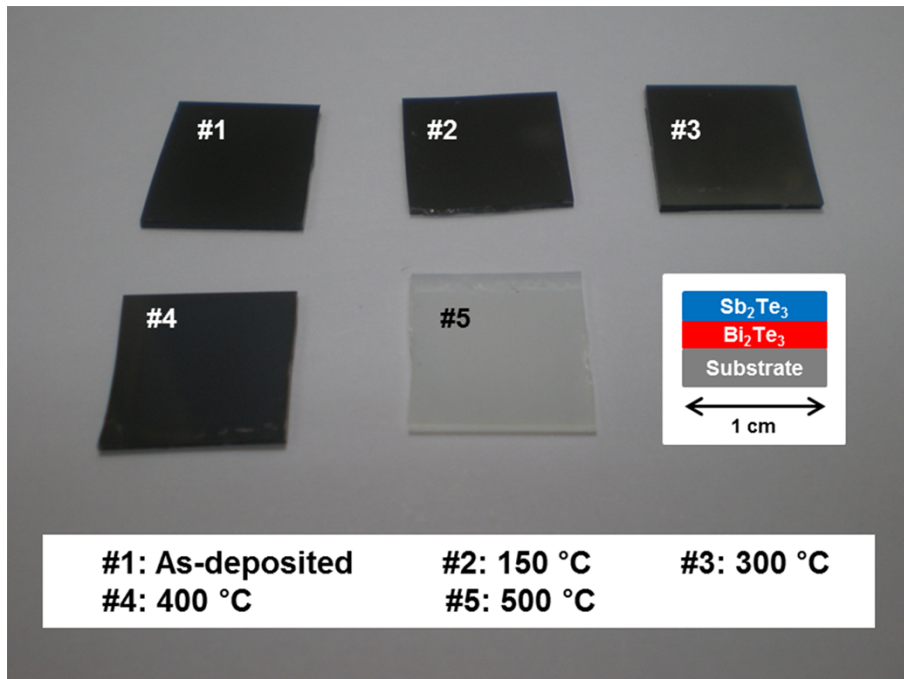

**Fig. S1.** Photograph of Bi<sub>2</sub>Te<sub>3</sub>/Sb<sub>2</sub>Te<sub>3</sub> multilayer films as a function of annealing temperature.

Inset shows a cross-section of samples.
